# Supplementary material for: R-phycoerythrin proteins@ZIF-8 composite thin films for mercury ion detection
Source: Royal Society of Chemistry journal article supplement (doi:10.1039/c9an00449a), 2019-01-01
Supplement: c9an00449a1.pdf [file c9an00449a1.pdf]

## SUPPORTING INFORMATION

---

### **R-Phycoerythrin Proteins@ZIF-8 Composite Thin Film for Mercury Ions Detection**

Xiaobin Wang, Zhishan Fang, Zhuoyi Li, Wen Ying, Danke Chen, Haiping He, Xinsheng Peng<sup>\*c</sup>

**Abstract:** Mercury, as one of the most prevalent toxic metals released by various natural and anthropogenic processes, causes severe pollution of soil and groundwater. In this work, R-Phycoerythrin (R-PE) proteins encapsulated in ZIF-8 composite thin films were prepared via a solid-confinement conversion process and applied as fluorescent sensor for mercury ions detection. The R-PE proteins encapsulated in ZIF-8 exhibit dual colors emission including green (518 nm) and red (602, 650 nm) fluorescence, while the original orange emission (578 nm) of pure R-PE is significantly suppressed. R-PE@ZIF-8 presents excellent selectivity and sensitivity for mercury detection in a large pH range without buffer solution. Under the optimal conditions, there is a good linear relationship for mercury ions in the range of 0.001-50  $\mu\text{M}$  with the detection limit (LOD) of 6.7 nM much lower than the guideline value given by the World Health Organization. Furthermore, multi-peak detection of R-PE@ZIF-8 improves the detecting accuracy of  $\text{Hg}^{2+}$  concentration.

## SUPPORTING INFORMATION

**Table S1** Linear regression equations and the detection limits (LODs) of R-PE@ZIF-8 for Hg<sup>2+</sup>

| Wavelength (nm) | Equation           | R <sup>2</sup> | LOD (nM) |
|-----------------|--------------------|----------------|----------|
| 518             | $y = 15.1x + 39.3$ | 0.968          | 6.7      |
| 602             | $y = 13.6x + 51.2$ | 0.983          | 7.4      |
| 650             | $y = 14.3x + 60.4$ | 0.964          | 7.1      |

concentration detection.

**Table S2** Brief specifications of the previously reported fluorometric mercury sensors.

| Strategies                        | Linear range       | Detection limit<br>(nM) | Reaction time<br>(min) | References |
|-----------------------------------|--------------------|-------------------------|------------------------|------------|
| Rhodamine-based fluorescent probe | 0.001-0.1 $\mu$ M  | 0.1                     | 2                      | 1          |
| Gold nanoparticles                | 0.02-1.0 $\mu$ M   | 16                      | 30                     | 2          |
| DNA-based fluorogenic probe       | 0-0.05 $\mu$ M     | 2.1                     | 30                     | 3          |
| GSH-capped CdS nanoparticles      | 0.015-1.25 $\mu$ M | 4.5                     | 5                      | 4          |
| R-PE solution                     | 0.001-25 $\mu$ M   | 13                      | 10                     | 5          |
| CdTe quantum dots                 | 0.006-0.45 $\mu$ M | 4.0                     | 5                      | 6          |
| R-PE@ZIF-8 thin films             | 0.001-50 $\mu$ M   | 6.7                     | 5                      | This work  |

## References

- 1 X. C. Fu, J. Wu, C. G. Xie, Y. Zhong and J. H. Liu, *Anal. Methods.*, 2013, **5**, 2615-2622.
- 2 D. D. Tan, Y. He, X. J. Xing, Y. Zhao, H. W. Tang and D. W. Pang, *Talanta*, 2013, **113**, 26-30.
- 3 C. L. Hao, L. G. Xua, C. R. Xing, H. Kuang, L. B. Wang and C. L. Xu, *Biosens. Bioelectron.*, 2012, **36**, 174-178.

## SUPPORTING INFORMATION

---

4 A. N. Liang, L. Wang, H. Q. Chen, B. B. Qian, B. Ling and J. Fu, *Talanta*, 2010, **81**, 438-443.

5 Q. F. Wang, Y. F. Xu, Y. H. Hou, Y. F. Wang and W. Hua, *Rsc. Adv.*, 2016, **6**, 114685-114689.

6 X. J. Ding, L. B. Qu, R. Yang, Y. C. Zhou and J. J. Li, *Luminescence*, 2015, **30**, 465-471.
